# Supplementary material for: Early maternal loss affects social integration of chimpanzees throughout their lifetime
Source: PubMed Central journal article supplement (PMC4639738; doi:10.1038/srep16439), 2015-11-10
Supplement: srep16439-s1.pdf [file srep16439-s1.pdf]

Supplementary Information

**Early maternal loss affects social integration of chimpanzees throughout their lifetime**

Elfriede Kalcher-Sommersguter, Signe Preuschoft, Cornelia Franz-Schaider, Charlotte K.

Hemelrijk, Karl Crailsheim & Jorg J. M. Massen

**Supplementary Table 1. Biographic information on the subjects**

| Name                              | Sex | Est. Age at Onset of Deprivation | Years Spent Single Housed | Age at Onset of Observation | Deprivation Class |
|-----------------------------------|-----|----------------------------------|---------------------------|-----------------------------|-------------------|
| <b>ALL-MALE GROUP (EX-LAB)</b>    |     |                                  |                           |                             |                   |
| Gogo                              | M   | 2                                | 27                        | 29                          | ELD               |
| Max                               | M   | 1                                | 24                        | 25                          | ELD               |
| Isidor                            | M   | 1                                | 24                        | 25                          | ELD               |
| Johannes                          | M   | 1                                | 21                        | 22                          | ELD               |
| Michi                             | M   | 1                                | 21                        | 22                          | ELD               |
| Blacky                            | M   | 1                                | 17                        | 18                          | ELD               |
| Jakob                             | M   | 3                                | 16                        | 20                          | LLD               |
| <b>MIXED-SEX GROUP 1 (EX-LAB)</b> |     |                                  |                           |                             |                   |
| Clyde                             | M   | 4                                | 16                        | 21                          | LLD               |
| Pünktchen                         | F   | 3                                | 16                        | 20                          | LLD               |
| Martha                            | F   | 1                                | 24                        | 25                          | ELD               |
| Ingrid                            | F   | 1                                | 23                        | 24                          | ELD               |
| Gabi                              | F   | 1                                | 23                        | 24                          | ELD               |
| <b>MIXED-SEX GROUP 2 (EX-LAB)</b> |     |                                  |                           |                             |                   |
| Moritz                            | M   | 3                                | 16                        | 20                          | LLD               |
| Anton                             | M   | 4                                | 16                        | 21                          | LLD               |
| Schuscha                          | F   | 4                                | 15                        | 21                          | LLD               |
| Helene                            | F   | 4                                | 15                        | 21                          | LLD               |
| Bonnie                            | F   | 4                                | 15                        | 21                          | LLD               |
| Susi                              | F   | 2                                | 27                        | 29                          | ELD               |
| <b>ARNHEM GROUP (ZOO)</b>         |     |                                  |                           |                             |                   |
| Fons                              | M   | -                                | -                         | 35                          | ND                |
| Gaby                              | F   | -                                | -                         | 26                          | ND                |
| Giambo                            | M   | -                                | -                         | 21                          | ND                |
| Geisha                            | F   | -                                | -                         | 17                          | ND                |
| Mama                              | F   | 1                                | 0                         | 53                          | EMD               |
| Moniek                            | F   | -                                | -                         | 33                          | ND                |
| Morami                            | F   | -                                | -                         | 23                          | ND                |
| Marka                             | F   | -                                | -                         | 26                          | ND                |
| Tepel                             | F   | 5                                | 0                         | 51                          | LMD*              |
| Teshua                            | F   | -                                | -                         | 24                          | ND                |
| Tushi                             | F   | -                                | -                         | 18                          | ND                |
| Jimmy                             | F   | 1                                | 1 <sup>b</sup>            | 50                          | EMD               |

|                               |   |   |                |    |      |
|-------------------------------|---|---|----------------|----|------|
| Jing                          | M | - | -              | 29 | ND   |
| Roos <sup>a</sup>             | F | - | -              | 31 | ND   |
| <b>AMERSFOORT GROUP (ZOO)</b> |   |   |                |    |      |
| Mike                          | M | 2 | 1 <sup>c</sup> | 45 | EMD  |
| Sonja                         | F | 2 | 0              | 46 | EMD  |
| Belle                         | F | - | -              | 33 | ND   |
| Willy                         | F | - | -              | 19 | ND   |
| Sjors                         | F | 1 | 0              | 44 | EMD  |
| Kokkie                        | F | 2 | 0              | 44 | EMD  |
| Jet                           | F | 3 | 3 <sup>b</sup> | 40 | LMD* |
| Silvia                        | F | 2 | 0              | 36 | EMD  |
| Sanne                         | F | - | -              | 21 | ND   |
| Bibi                          | F | - | -              | 14 | ND   |
| Chura                         | F | - | -              | 13 | ND   |

---

Notes: Estimated age of maternally deprived zoo chimpanzees is based on Carlsen<sup>44</sup>. Tom de Jongh (EEP vice-coordinator) and Raymond van der Meer (curator Dierenpark Amersfoort) provided information regarding early rearing conditions of founder chimpanzees.

<sup>a</sup>adopted and reared by Mama, <sup>b</sup>Private Owner, <sup>c</sup>Circus; ELD = early and long-term deprived, LLD = late and long-term deprived, EMD = early maternally (and short-term) deprived, LMD = late maternally (and short-term) deprived, ND = non-deprived.

\*Not considered in statistical analysis due to small sample size.

**Supplementary Table 2. Medians (and range) of vertex strength centrality and deviation from edge weight disparity of close proximity and grooming given, respectively, for the different predictors**

| Dependent Variable                                                   | Predictor                                                              |                                                                      |                                                                        |                                                                        | Mann-Whitney U w/ Holm-Bonferroni                                                                                                                                                                                                                                                                  |                                                                      |                                                                        |                                                                                                                                                       |
|----------------------------------------------------------------------|------------------------------------------------------------------------|----------------------------------------------------------------------|------------------------------------------------------------------------|------------------------------------------------------------------------|----------------------------------------------------------------------------------------------------------------------------------------------------------------------------------------------------------------------------------------------------------------------------------------------------|----------------------------------------------------------------------|------------------------------------------------------------------------|-------------------------------------------------------------------------------------------------------------------------------------------------------|
|                                                                      | Sample Size, Median, Range                                             |                                                                      |                                                                        |                                                                        |                                                                                                                                                                                                                                                                                                    |                                                                      |                                                                        |                                                                                                                                                       |
| <b>CLOSE PROXIMITY</b>                                               |                                                                        |                                                                      |                                                                        |                                                                        |                                                                                                                                                                                                                                                                                                    |                                                                      |                                                                        |                                                                                                                                                       |
| -----Subsequent to Re-socialisation-----                             | <b>Age Class</b>                                                       |                                                                      |                                                                        |                                                                        |                                                                                                                                                                                                                                                                                                    |                                                                      |                                                                        |                                                                                                                                                       |
|                                                                      | Mature                                                                 |                                                                      | Old                                                                    |                                                                        |                                                                                                                                                                                                                                                                                                    |                                                                      |                                                                        |                                                                                                                                                       |
|                                                                      | VSC: <i>n</i> =33, 1.9, 0.2-7.4<br>DEWD: <i>n</i> =33, 0.08, 0.01-0.80 |                                                                      | VSC: <i>n</i> =8, 3.3, 1.2-4.1<br>DEWD: <i>n</i> =8, 0.02, 0.01-0.11   |                                                                        |                                                                                                                                                                                                                                                                                                    |                                                                      |                                                                        |                                                                                                                                                       |
|                                                                      | <b>Sex</b>                                                             |                                                                      |                                                                        |                                                                        |                                                                                                                                                                                                                                                                                                    |                                                                      |                                                                        |                                                                                                                                                       |
|                                                                      | Male                                                                   |                                                                      | Female                                                                 |                                                                        |                                                                                                                                                                                                                                                                                                    |                                                                      |                                                                        |                                                                                                                                                       |
|                                                                      | VSC: <i>n</i> =14, 1.2, 0.2-4.7<br>DEWD: <i>n</i> =14, 0.13, 0.02-0.34 |                                                                      | VSC: <i>n</i> =27, 3.8, 0.2-7.4<br>DEWD: <i>n</i> =27, 0.04, 0.01-0.80 |                                                                        |                                                                                                                                                                                                                                                                                                    | VSC: <i>U</i> =65.0, <i>P</i> =0.001                                 |                                                                        |                                                                                                                                                       |
|                                                                      | <b>Deprivation Class</b>                                               |                                                                      |                                                                        |                                                                        |                                                                                                                                                                                                                                                                                                    |                                                                      |                                                                        |                                                                                                                                                       |
|                                                                      | ELD                                                                    | LLD                                                                  | EMD                                                                    | ND                                                                     |                                                                                                                                                                                                                                                                                                    |                                                                      |                                                                        |                                                                                                                                                       |
|                                                                      | VSC: <i>n</i> =10, 1.2, 0.2-1.6<br>DEWD: <i>n</i> =10, 0.20, 0.05-0.80 | VSC: <i>n</i> =8, 1.5, 0.2-7.4<br>DEWD: <i>n</i> =8, 0.20, 0.07-0.31 | VSC: <i>n</i> =7, 3.4, 1.2-4.1<br>DEWD: <i>n</i> =7, 0.02, 0.01-0.11   | VSC: <i>n</i> =16, 4.1, 1.9-5.7<br>DEWD: <i>n</i> =16, 0.02, 0.01-0.10 | VSC: ELD vs. EMD: <i>U</i> =4.0, <i>P</i> =0.001,<br>ELD vs. ND: <i>U</i> =0.0, <i>P</i> <0.001<br>DEWD: ELD vs. EMD: <i>U</i> =3.0, <i>P</i> =0.001,<br>ELD vs. ND: <i>U</i> =3.0, <i>P</i> <0.001,<br>LLD vs. EMD: <i>U</i> =1.0, <i>P</i> =0.001,<br>LLD vs. ND: <i>U</i> =1.0, <i>P</i> <0.001 |                                                                      |                                                                        |                                                                                                                                                       |
|                                                                      | <b>Sex*Deprivation Class</b>                                           |                                                                      |                                                                        |                                                                        |                                                                                                                                                                                                                                                                                                    |                                                                      |                                                                        |                                                                                                                                                       |
| Male                                                                 |                                                                        |                                                                      |                                                                        | Female                                                                 |                                                                                                                                                                                                                                                                                                    |                                                                      |                                                                        |                                                                                                                                                       |
| ELD                                                                  | LLD                                                                    | EMD                                                                  | ND                                                                     | ELD                                                                    | LLD                                                                                                                                                                                                                                                                                                | EMD                                                                  | ND                                                                     |                                                                                                                                                       |
| VSC: <i>n</i> =6, 0.8, 0.4-1.5<br>DEWD: <i>n</i> =6, 0.18, 0.05-0.34 | VSC: <i>n</i> =4, 1.0, 0.2-1.8<br>DEWD: <i>n</i> =4, 0.23, 0.07-0.31   | VSC: <i>n</i> =1, 1.2<br>DEWD: <i>n</i> =1, 0.02                     | VSC: <i>n</i> =3, 3.1, 3.1-4.7<br>DEWD: <i>n</i> =3, 0.02, 0.02-0.02   | VSC: <i>n</i> =4, 1.3, 0.2-1.6<br>DEWD: <i>n</i> =4, 0.26, 0.09-0.80   | VSC: <i>n</i> =4, 5.2, 1.2-7.4<br>DEWD: <i>n</i> =4, 0.20, 0.17-0.31                                                                                                                                                                                                                               | VSC: <i>n</i> =6, 3.6, 2.5-4.1<br>DEWD: <i>n</i> =6, 0.03, 0.01-0.11 | VSC: <i>n</i> =13, 4.1, 1.9-5.7<br>DEWD: <i>n</i> =13, 0.02, 0.01-0.10 | VSC: ELD <sub>f</sub> vs. EMD <sub>f</sub> : <i>U</i> =0.0, <i>P</i> =0.010,<br>ELD <sub>f</sub> vs. ND <sub>f</sub> : <i>U</i> =0.0, <i>P</i> =0.001 |

Supplementary Table 2 cont.

|                                              |  | Age Class                     |                               |                             |                               |                               |                               |                                |                                |
|----------------------------------------------|--|-------------------------------|-------------------------------|-----------------------------|-------------------------------|-------------------------------|-------------------------------|--------------------------------|--------------------------------|
|                                              |  | Mature                        |                               | Old                         |                               |                               |                               |                                |                                |
| -----2 <sup>nd</sup> Year of Group-life----- |  | VSC: n=33, 3.5, 0.0-5.9       |                               | VSC: n=8, 3.3, 1.2-4.1      |                               |                               |                               |                                |                                |
|                                              |  | DEWD: n=32, 0.09, 0.01-0.83   |                               | DEWD: n=8, 0.02, 0.01-0.11  |                               |                               |                               |                                |                                |
|                                              |  | Sex                           |                               |                             |                               |                               |                               |                                |                                |
|                                              |  | Male                          |                               | Female                      |                               |                               |                               |                                |                                |
|                                              |  | VSC: n=14, 1.8, 0.0-4.7       |                               | VSC: n=27, 3.8, 0.2-5.9     |                               |                               |                               |                                |                                |
|                                              |  | DEWD: n=13, 0.17, 0.02-0.83   |                               | DEWD: n=27, 0.04, 0.01-0.36 |                               |                               |                               |                                |                                |
|                                              |  | Deprivation Class             |                               |                             |                               |                               |                               |                                |                                |
|                                              |  | ELD                           | LLD                           | EMD                         | ND                            |                               |                               |                                |                                |
|                                              |  | VSC: n=10, 0.3, 0.0-3.6       | VSC: n=8, 4.3, 0.1-5.9        | VSC: n=7, 3.4, 1.2-4.1      | VSC: n=16, 4.1, 1.9-5.7       |                               |                               |                                |                                |
|                                              |  | DEWD: n=9, 0.36, 0.10-0.83    | DEWD: n=8, 0.15, 0.04-0.83    | DEWD: n=7, 0.02, 0.01-0.11  | DEWD: n=16, 0.02, 0.01-0.10   |                               |                               |                                |                                |
|                                              |  | Sex*Deprivation Class         |                               |                             |                               |                               |                               |                                |                                |
|                                              |  | Male                          |                               |                             |                               | Female                        |                               |                                |                                |
|                                              |  | ELD                           | LLD                           | EMD                         | ND                            | ELD                           | LLD                           | EMD                            | ND                             |
|                                              |  | VSC: n=6,<br>0.7, 0.0-3.6     | VSC: n=4,<br>2.4, 0.1-4.6     | VSC: n=1,<br>1.2            | VSC: n=3,<br>3.1,3.1-4.7      | VSC: n=4,<br>0.3, 0.2-0.6     | VSC: n=4,<br>4.8, 0.3-5.9     | VSC: n=6,<br>3.6, 2.5-4.1      | VSC: n=13,<br>4.1,1.9-5.7      |
|                                              |  | DEWD: n=5,<br>0.83, 0.33-0.83 | DEWD: n=4,<br>0.16, 0.04-0.83 | DEWD: n=1,<br>0.02          | DEWD: n=3,<br>0.02, 0.02-0.02 | DEWD: n=4,<br>0.21, 0.10-0.36 | DEWD: n=4,<br>0.13, 0.09-0.32 | DEWD: n=6,<br>0.03, 0.01-0.11: | DEWD: n=13,<br>0.02, 0.01-0.10 |

Supplementary Table 2 cont.

| Dependent Variable                                                   | Predictor                                                              |                                                                        | Mann-Whitney U w/ Holm-Bonferroni                                    |                                                                                                                                                        |                                                                                                                                                                                                                                                                                                                                                                                          |
|----------------------------------------------------------------------|------------------------------------------------------------------------|------------------------------------------------------------------------|----------------------------------------------------------------------|--------------------------------------------------------------------------------------------------------------------------------------------------------|------------------------------------------------------------------------------------------------------------------------------------------------------------------------------------------------------------------------------------------------------------------------------------------------------------------------------------------------------------------------------------------|
|                                                                      | Sample Size, Median, Range                                             |                                                                        |                                                                      |                                                                                                                                                        |                                                                                                                                                                                                                                                                                                                                                                                          |
| <b>GROOMING GIVEN</b>                                                |                                                                        |                                                                        |                                                                      |                                                                                                                                                        |                                                                                                                                                                                                                                                                                                                                                                                          |
| Subsequent to Re-socialisation                                       | <b>Age Class</b>                                                       |                                                                        |                                                                      |                                                                                                                                                        |                                                                                                                                                                                                                                                                                                                                                                                          |
|                                                                      | Mature                                                                 | Old                                                                    |                                                                      |                                                                                                                                                        |                                                                                                                                                                                                                                                                                                                                                                                          |
|                                                                      | VSC: <i>n</i> =33, 0.5, 0.0-4.4<br>DEWD: <i>n</i> =23, 0.18, 0.05-0.83 | VSC: <i>n</i> =8, 0.2, 0.1-0.6<br>DEWD: <i>n</i> =8, 0.35, 0.08-0.90   |                                                                      |                                                                                                                                                        |                                                                                                                                                                                                                                                                                                                                                                                          |
|                                                                      | <b>Sex</b>                                                             |                                                                        |                                                                      |                                                                                                                                                        |                                                                                                                                                                                                                                                                                                                                                                                          |
|                                                                      | Male                                                                   | Female                                                                 |                                                                      |                                                                                                                                                        |                                                                                                                                                                                                                                                                                                                                                                                          |
|                                                                      | VSC: <i>n</i> =14, 0.1, 0.0-1.1<br>DEWD: <i>n</i> =8, 0.75, 0.10-0.90  | VSC: <i>n</i> =27, 0.6, 0.0-4.4<br>DEWD: <i>n</i> =23, 0.18, 0.05-0.90 |                                                                      | DEWD: <i>U</i> =50.5, <i>P</i> =0.064                                                                                                                  |                                                                                                                                                                                                                                                                                                                                                                                          |
|                                                                      | <b>Deprivation Class</b>                                               |                                                                        |                                                                      |                                                                                                                                                        |                                                                                                                                                                                                                                                                                                                                                                                          |
|                                                                      | ELD                                                                    | LLD                                                                    | EMD                                                                  | ND                                                                                                                                                     |                                                                                                                                                                                                                                                                                                                                                                                          |
|                                                                      | VSC: <i>n</i> =10, 0.0, 0.0-0.1<br>DEWD: <i>n</i> =2, 0.83, 0.83-0.84  | VSC: <i>n</i> =8, 0.7, 0.0-4.4<br>DEWD: <i>n</i> =6, 0.34, 0.23-0.80   | VSC: <i>n</i> =7, 0.1, 0.1-0.6<br>DEWD: <i>n</i> =7, 0.40, 0.08-0.90 | VSC: <i>n</i> =16, 1.1, 0.1-1.5<br>DEWD: <i>n</i> =16, 0.13, 0.05-0.35                                                                                 | VSC: <b>ELD vs. LLD: <i>U</i>=12.0, <i>P</i>=0.014,</b><br><b>ELD vs. EMD: <i>U</i>=4.0, <i>P</i>=0.003,</b><br><b>ELD vs. ND: <i>U</i>=1.0, <i>P</i>&lt;0.001,</b><br><b>EMD vs. ND: <i>U</i>=8.5, <i>P</i>=0.002</b><br>DEWD: <b>ELD vs. ND: <i>U</i>=0.0, <i>P</i>=0.013,</b><br><b>ELD vs. ND: <i>U</i>=6.0, <i>P</i>=0.001,</b><br><b>EMD vs. ND: <i>U</i>=18.0, <i>P</i>=0.010</b> |
|                                                                      | <b>Sex*Deprivation Class</b>                                           |                                                                        |                                                                      |                                                                                                                                                        |                                                                                                                                                                                                                                                                                                                                                                                          |
| Male                                                                 |                                                                        | Female                                                                 |                                                                      |                                                                                                                                                        |                                                                                                                                                                                                                                                                                                                                                                                          |
| ELD                                                                  | LLD                                                                    | EMD                                                                    | ND                                                                   |                                                                                                                                                        |                                                                                                                                                                                                                                                                                                                                                                                          |
| VSC: <i>n</i> =6, 0.0, 0.0-0.1<br>DEWD: <i>n</i> =6, 0.83, 0.83-0.84 | VSC: <i>n</i> =4, 0.3, 0.0-1.1<br>DEWD: <i>n</i> =4, 0.75, 0.69-0.80   | VSC: <i>n</i> =1, 0.1<br>DEWD: <i>n</i> =1, 0.90                       | VSC: <i>n</i> =3, 0.7, 0.6-1.1<br>DEWD: <i>n</i> =3, 0.11, 0.10-0.19 | VSC: <i>n</i> =4, 0.0, 0.0-0.0<br>DEWD: <i>n</i> =0                                                                                                    |                                                                                                                                                                                                                                                                                                                                                                                          |
|                                                                      |                                                                        |                                                                        |                                                                      | VSC: <i>n</i> =4, 1.5, 0.4-4.4<br>DEWD: <i>n</i> =4, 0.31, 0.23-0.35                                                                                   |                                                                                                                                                                                                                                                                                                                                                                                          |
|                                                                      |                                                                        |                                                                        |                                                                      | VSC: <i>n</i> =6, 0.2, 0.1-0.6<br>DEWD: <i>n</i> =6, 0.35, 0.08-0.90                                                                                   |                                                                                                                                                                                                                                                                                                                                                                                          |
|                                                                      |                                                                        |                                                                        |                                                                      | VSC: <i>n</i> =13, 1.1, 0.1-1.5<br>DEWD: <i>n</i> =13, 0.14, 0.05-0.35                                                                                 |                                                                                                                                                                                                                                                                                                                                                                                          |
|                                                                      |                                                                        |                                                                        |                                                                      | DEWD: LLD <sub>f</sub> vs. ND <sub>f</sub> : <i>U</i> =6.0, <i>P</i> =0.023,<br>EMD <sub>f</sub> vs. ND <sub>f</sub> : <i>U</i> =15.0, <i>P</i> =0.037 |                                                                                                                                                                                                                                                                                                                                                                                          |

Supplementary Table 2 cont.

|                                    |                                | Age Class                      |                                                                                                                                            |    |
|------------------------------------|--------------------------------|--------------------------------|--------------------------------------------------------------------------------------------------------------------------------------------|----|
| 2 <sup>nd</sup> Year of Group-life | Mature                         | Old                            |                                                                                                                                            |    |
|                                    | VSC: $n=33$ , 0.7, 0.0-2.9     | VSC: $n=8$ , 0.2, 0.1-0.6      |                                                                                                                                            |    |
|                                    | DEWD: $n=24$ , 0.17, 0.05-0.83 | DEWD: $n=8$ , 0.35, 0.08-0.90  |                                                                                                                                            |    |
|                                    |                                |                                | Sex                                                                                                                                        |    |
|                                    | Male                           | Female                         |                                                                                                                                            |    |
|                                    | VSC: $n=14$ , 0.3, 0.0-1.6     | VSC: $n=27$ , 0.7, 0.0-2.9     |                                                                                                                                            |    |
|                                    | DEWD: $n=9$ , 0.35, 0.10-0.90  | DEWD: $n=23$ , 0.17, 0.05-0.90 |                                                                                                                                            |    |
|                                    |                                |                                | DEWD: $U=55.5$ , $P=0.047$                                                                                                                 |    |
|                                    |                                |                                | Deprivation Class                                                                                                                          |    |
|                                    | ELD                            | LLD                            | EMD                                                                                                                                        | ND |
| VSC: $n=10$ , 0.0, 0.0-0.6         | VSC: $n=8$ , 0.8, 0.0-2.9      | VSC: $n=7$ , 0.1, 0.1-0.6      | VSC: $n=16$ , 1.1, 0.1-1.5                                                                                                                 |    |
| DEWD: $n=2$ , 0.59, 0.35-0.83      | DEWD: $n=7$ , 0.28, 0.06-0.83  | DEWD: $n=7$ , 0.40, 0.08-0.90  | DEWD: $n=16$ , 0.13, 0.05-0.35                                                                                                             |    |
|                                    |                                |                                | †<br>VSC: <b>ELD vs. LLD: <math>U=8.0</math>, <math>P=0.005</math></b> ,<br><b>ELD vs. ND: <math>U=6.5</math>, <math>P&lt;0.001</math></b> |    |
|                                    |                                | Sex*Deprivation Class          |                                                                                                                                            |    |
| Male                               |                                | Female                         |                                                                                                                                            |    |
| ELD                                | LLD                            | EMD                            | ND                                                                                                                                         |    |
| VSC: $n=6$ , 0.0, 0.0-0.6          | VSC: $n=4$ , 0.5, 0.0-1.6      | VSC: $n=1$ , 0.1               | VSC: $n=3$ , 0.7, 0.6-1.1                                                                                                                  |    |
| DEWD: $n=2$ , 0.59, 0.35-0.83      | DEWD: $n=3$ , 0.63, 0.28-0.83  | DEWD: $n=1$ , 0.90             | DEWD: $n=3$ , 0.11, 0.10-0.19                                                                                                              |    |
| VSC: $n=4$ , 0.0, 0.0-0.0          | VSC: $n=4$ , 1.2, 0.8-2.9      | VSC: $n=4$ , 0.2, 0.1-0.6      | VSC: $n=13$ , 1.1, 0.1-1.5                                                                                                                 |    |
| DEWD: $n=0$                        | DEWD: $n=4$ , 0.17, 0.06-0.52  | DEWD: $n=6$ , 0.40, 0.08-0.90  | DEWD: $n=13$ , 0.14, 0.05-0.35                                                                                                             |    |

Abbr.: ELD = early and long-term deprived, LLD = late and long-term deprived, EMD = early maternally (and short-term) deprived, ND = non-deprived, VSC = vertex strength centrality, DEWD = deviation from edge weight disparity.

Significant outcomes of post-hoc Mann-Whitney U tests after Holm-Bonferroni correction are shown in bold.

† Note that values for the zoo chimpanzees did not change and thus for comparisons between EMD and ND we refer to the earlier analyses (subsequent to re-socialisation) above.

**Supplementary Table 3. Medians (and range) of vertex strength centrality and deviation from edge weight disparity of grooming given for *mature* early maternally deprived (EMD<sub>M</sub>), *old* early maternally deprived (EMD<sub>O</sub>) and non-deprived (ND) chimpanzees in comparison**

| Dependent Variable                                                   | Predictor<br>Sample Size, Median, Range                              |                                                                        |  | Mann-Whitney U<br>w/ Holm-Bonferroni                                                                                                                                                                                                                                                                                                                                                                              |
|----------------------------------------------------------------------|----------------------------------------------------------------------|------------------------------------------------------------------------|--|-------------------------------------------------------------------------------------------------------------------------------------------------------------------------------------------------------------------------------------------------------------------------------------------------------------------------------------------------------------------------------------------------------------------|
| <i>GROOMING GIVEN</i>                                                |                                                                      |                                                                        |  |                                                                                                                                                                                                                                                                                                                                                                                                                   |
|                                                                      | <b>Age Class</b>                                                     |                                                                        |  |                                                                                                                                                                                                                                                                                                                                                                                                                   |
| EMD <sub>M</sub> *                                                   | EMD <sub>O</sub>                                                     | ND                                                                     |  |                                                                                                                                                                                                                                                                                                                                                                                                                   |
| VSC: <i>n</i> =7, 0.1, 0.0-0.5<br>DEWD: <i>n</i> =7, 0.33, 0.12-0.50 | VSC: <i>n</i> =7, 0.1, 0.1-0.6<br>DEWD: <i>n</i> =7, 0.40, 0.08-0.90 | VSC: <i>n</i> =16, 1.1, 0.1-1.5<br>DEWD: <i>n</i> =16, 0.13, 0.05-0.35 |  | VSC: EMD <sub>M</sub> vs. EMD <sub>O</sub> : <i>U</i> = 22.0, <i>P</i> =0.805,<br>EMD <sub>M</sub> vs. ND: <i>U</i> =7.0, <i>P</i> <0.001,<br>EMD <sub>O</sub> vs. ND: <i>U</i> =8.5, <i>P</i> =0.002<br>DEWD: EMD <sub>M</sub> vs. EMD <sub>O</sub> : <i>U</i> = 17.0, <i>P</i> =0.383,<br>EMD <sub>M</sub> vs. ND: <i>U</i> =17.0, <i>P</i> =0.008,<br>EMD <sub>O</sub> vs. ND: <i>U</i> =18.0, <i>P</i> =0.010 |

Note: \*EMD<sub>M</sub> comprises seven adult females (for details see Table below) from Arnhem zoo. Vertex strength centrality and deviation from edge weight disparity were calculated out of individual medians for every groomer-groomee dyad over a 10-year period (1976-1985). Charlotte Hemelrijk provided scan data.

| Name    | Est. Age at Onset of<br>Deprivation <sup>1</sup> | Age in 1976 <sup>3</sup> | Observation period | Number of Available Adult<br>Grooming Partners 1976-1985 |
|---------|--------------------------------------------------|--------------------------|--------------------|----------------------------------------------------------|
| Mama    | 1                                                | 20                       | 1976-1985          | 7-15                                                     |
| Puist   | ?                                                | 16                       | 1976-1985          | 7-15                                                     |
| Gorilla | 2 <sup>2</sup>                                   | 19                       | 1976-1985          | 7-15                                                     |
| Jimmy   | 1                                                | 16                       | 1976-1985          | 7-15                                                     |
| Franje  | 2 <sup>2</sup>                                   | 19                       | 1976-1979          | 7-9                                                      |
| Krom    | 1                                                | 15                       | 1976-1984          | 7-14                                                     |
| Spin    | ?                                                | 16                       | 1976-1985          | 7-15                                                     |

<sup>1</sup>Carlsen, F. European studbook for the chimpanzee *Pan troglodytes* (Copenhagen Zoo, 2009).

<sup>2</sup>Based on information and a picture provided by Tom de Jongh (EEP vice-coordinator).

<sup>3</sup>Adang, O. M. J., Wensing, J. A. B. & van Hooff, J. A. R. A. M. The Arnhem Zoo colony of chimpanzees *Pan troglodytes*: development and management techniques. *Int. Zoo Yb.* **26**, 236-248 (1987).



**Supplementary Table 4. Model selection according to comparisons of the corrected Akaike Information Criteria (cAICs)**

|                                                                                                     | <b>Dependent Variable</b>            | <b>Model</b>                                     | <b>F</b>      | <b>P</b>     | <b>cAIC</b>    | <b>Δ cAIC</b> |
|-----------------------------------------------------------------------------------------------------|--------------------------------------|--------------------------------------------------|---------------|--------------|----------------|---------------|
| <b>CLOSE PROXIMITY<br/>a) subsequent to<br/>re-socialisation for ex-<br/>laboratory chimpanzees</b> | Vertex strength centrality           | <b>Full Model</b>                                | <b>4.514</b>  | <b>0.001</b> | <b>112.444</b> |               |
|                                                                                                     |                                      | Full Model - Age class                           | 5.176         | 0.000        | 115.144        | -2.700        |
|                                                                                                     | Deviation from edge weight disparity | Full Model                                       | 3.662         | 0.004        | -32.485        |               |
|                                                                                                     |                                      | Reduction 1: Full Model - Age class              | 4.040         | 0.003        | -34.629        | 2.144         |
|                                                                                                     |                                      | Reduction 2: Reduction 1 - Sex*Deprivation class | 9.689         | 0.000        | -40.034        | 5.405         |
|                                                                                                     |                                      | <b>Reduction 3: Reduction 2 - Sex</b>            | <b>12.073</b> | <b>0.000</b> | <b>-42.859</b> | <b>2.825</b>  |
| <b>CLOSE PROXIMITY<br/>b) 2nd of group-life for ex-<br/>laboratory chimpanzees</b>                  | Vertex strength centrality           | Full Model                                       | 1.666         | n.s.         |                |               |
|                                                                                                     | Deviation from edge weight disparity | Full Model                                       | 0.807         | n.s.         |                |               |
| <b>GROOMING GIVEN<br/>a) subsequent to<br/>re-socialisation for ex-<br/>laboratory chimpanzees</b>  | Vertex strength centrality           | <b>Full Model</b>                                | <b>3.408</b>  | <b>0.006</b> | <b>76.720</b>  |               |
|                                                                                                     |                                      | Full Model - Age class                           | 3.956         | 0.003        | 78.114         | -1.394        |
|                                                                                                     |                                      | Full Model - Sex                                 | 3.408         | 0.006        | 76.720         | 0.000         |
|                                                                                                     |                                      | Full Model - Sex*Deprivation class               | 3.328         | 0.015        | 87.614         | -10.894       |
|                                                                                                     | Deviation from edge weight disparity | Full Model                                       | 8.623         | 0.000        | -9.405         |               |
|                                                                                                     |                                      | <b>Full Model - Age class</b>                    | <b>10.365</b> | <b>0.000</b> | <b>-10.972</b> | <b>1.567</b>  |
| <b>GROOMING GIVEN<br/>b) 2nd of group-life for ex-<br/>laboratory chimpanzees</b>                   | Vertex strength centrality           | <b>Full Model</b>                                | <b>3.758</b>  | <b>0.003</b> | <b>57.115</b>  |               |
|                                                                                                     |                                      | Full Model - Age class                           | 4.338         | 0.002        | 57.998         | -0.883        |
|                                                                                                     |                                      | Full Model - Sex                                 | 3.758         | 0.003        | 57.115         | -0.000        |
|                                                                                                     |                                      | Full Model - Sex*Deprivation class               | 4.473         | 0.003        | 64.130         | -7.015        |
|                                                                                                     | Deviation from edge weight disparity | Full Model                                       | 3.484         | 0.100        | 0.863          |               |
|                                                                                                     |                                      | <b>Reduction 1: Full Model - Age class</b>       | <b>4.213</b>  | <b>0.005</b> | <b>-0.368</b>  | <b>1.231</b>  |
|                                                                                                     |                                      | Reduction 2: Reduction 1 - Sex*Deprivation class | 4.618         | 0.006        | 1.417          | -1.785        |

Bold: Best-fitting models according to comparisons of cAICs; if  $\Delta$  cAIC > 2, we chose the new model (Burnham and Anderson 2002), and if  $0 < \Delta$  cAIC < 2, we chose the most parsimonious model.

Supplemental references:

Burnham, K. P. & Anderson, D. R. *Model selection and multimodel inference: a practical information-theoretic approach* (Springer, 2002).
